# Supplementary material for: Cancer-associated retinopathy preceding the diagnosis of cancer
Source: Springer Nature journal article supplement (doi:10.1186/s12886-018-0948-2), 2018-11-03
Supplement: MOESM1 [file 16249094]

**Supplementary Table: Treatment modalities and follow-up data**

| Case n° | Treatment for ophthalmological condition                                                 |                                               | Follow-up (months) | Decimal BCVA (OD/OS) | Retinal pigment | Peripheral retinal atrophy | OCT (OD/OS)  | Visual Field        |
|---------|------------------------------------------------------------------------------------------|-----------------------------------------------|--------------------|----------------------|-----------------|----------------------------|--------------|---------------------|
|         | systemic                                                                                 | local                                         |                    |                      |                 |                            |              |                     |
| 1       | Plasmapheresis                                                                           | -                                             | 6                  | 0.7/0.7              | no              | no                         | ORAFS/ ORAFS | Ring scotoma stable |
| 2       | Intravenous methylprednisolone, Oral prednisone                                          | -                                             | 2                  | 1.2/1.2              | no              | no                         | ORAFS/ ORAFS | Tubular stable      |
| 3       | Oral prednisone, azathioprine                                                            | 3 IVT and 1 sub-Tenon triamcinolone injection | 36                 | CF/0.2               | yes             | yes                        | CME/DMA      | Ring scotoma worse  |
| 4       | Plasmapheresis, Intravenous immunoglobulins, azathioprine, oral prednisone, cyclosporine | -                                             | 120                | 0.4/0.2              | yes             | yes                        | ORAFS/ ORAFS | Tubular wore        |

BCVA: Best corrected visual acuity; CF: counting fingers; IVT: intravitreal injection; OCT: Optical coherence tomography; CME: Cystoid macular edema; DMA: Diffuse macular atrophy; ORAFS: Outer retinal atrophy with foveolar sparing
